# Supplementary material
Source: ML conference proceedings conference paper supplement (https://openaccess.thecvf.com/content/CVPR2023/html/Yao_HGNet_Learning_Hierarchical_CVPR_2023_paper.html)
Supplement: Supplementary file 1 [file Yao_HGNet_Learning_Hierarchical_CVPR_2023_supplemental.pdf]

# HGNet: Learning Hierarchical Geometry from Points, Edges, and Surfaces

## —CVPR 2023 Supplementary Material

Ting Yao, Yehao Li, Yingwei Pan, Tao Mei

HiDream.ai Inc.

{tingyao.ustc, yehaoli.sysu, panyw.ustc}@gmail.com, tmei@hidream.ai

The supplementary material contains the standard 6-fold cross-validation results of our HGNet [14] on S3DIS benchmark for semantic segmentation task.

### 1. Semantic Segmentation on S3DIS

Recall that in the main paper, we evaluate our HGNet on S3DIS benchmark by taking Area-5 as the testing scene and the remaining scenes as training set. Here we conduct additional experiments to evaluate our HGNet on S3DIS under the standard 6-fold cross-validation protocol. Table 1 lists the performance comparisons by using 6-fold cross-validation on S3DIS. Similarly, our HGNet clearly surpasses the point-based, edge/relation-based, and surface-based approaches, leading to the best performances across all the three metrics. Specifically, in comparison to PointNeXt-l, HGNet boosts up the performances by 1.2%, 2.0%, and 1.9% in OA, mAcc, and mIoU, respectively. The results again show the effectiveness of our HGNet on semantic segmentation task, even under the 6-fold cross-validation protocol.

### References

- [1] Qingyong Hu, Bo Yang, Linhai Xie, Stefano Rosa, Yulan Guo, Zhihua Wang, Niki Trigoni, and Andrew Markham. Randla-net: Efficient semantic segmentation of large-scale point clouds. In *CVPR*, 2020. 1
- [2] Guohao Li, Matthias Muller, Ali Thabet, and Bernard Ghanem. Deepgcns: Can gcn go as deep as cnns? In *ICCV*, 2019. 1
- [3] Yangyan Li, Rui Bu, Mingchao Sun, Wei Wu, Xinhan Di, and Baoquan Chen. Pointcnn: Convolution on x-transformed points. In *NeurIPS*, 2018. 1
- [4] Charles R Qi, Hao Su, Kaichun Mo, and Leonidas J Guibas. Pointnet: Deep learning on point sets for 3d classification and segmentation. In *Proceedings of the IEEE conference on computer vision and pattern recognition*, pages 652–660, 2017. 1
- [5] Charles Ruizhongtai Qi, Li Yi, Hao Su, and Leonidas J Guibas. Pointnet++: Deep hierarchical feature learning on point sets in a metric space. 2017. 1

Table 1. Comparison results of HGNet with other state-of-the-art methods on S3DIS for semantic segmentation under the 6-fold cross-validation protocol.

| Method                 | OA          | mAcc        | mIoU        | Params. | Throughput |
|------------------------|-------------|-------------|-------------|---------|------------|
| PointNet [4]           | 78.5        | 66.2        | 47.6        | 3.6M    | 162        |
| PointNet++ [5]         | 81.0        | 67.1        | 54.5        | 1.0M    | 186        |
| DGCNN [11]             | 84.1        | -           | 56.1        | 1.3M    | 8          |
| DeepGCN [2]            | 85.9        | -           | 60.0        | 3.6M    | 3          |
| PointCNN [3]           | 88.1        | 75.6        | 65.4        | 0.6M    | -          |
| PointWeb [16]          | 87.3        | 76.2        | 66.7        | -       | -          |
| ShellNet [15]          | 87.1        | -           | 66.8        | -       | -          |
| PointASNL [13]         | 88.8        | 79.0        | 68.7        | 22.4M   | -          |
| PACConv [12]           | -           | 78.6        | 69.3        | -       | -          |
| RandLA-Net [1]         | 88.0        | 82.0        | 70.0        | 1.3M    | 159        |
| KPConv [10]            | -           | 79.1        | 70.6        | 15.0M   | 30         |
| RPNet [9]              | -           | -           | 70.8        | 2.4M    | -          |
| BAAF-Net [7]           | 88.9        | 83.1        | 72.2        | 5.0M    | 10         |
| Point Transformer [17] | 90.2        | 81.9        | 73.5        | 7.8M    | 34         |
| PointNeXt-l [6]        | 89.8        | 82.2        | 73.9        | 7.1M    | 115        |
| RepSurf-U [8]          | 90.8        | 82.6        | 74.3        | 0.99M   | 69         |
| HGNet                  | <b>91.0</b> | <b>84.2</b> | <b>75.8</b> | 7.8M    | 92         |

- [6] Guocheng Qian, Yuchen Li, Houwen Peng, Jinjie Mai, Hasan Abed Al Kader Hammoud, Mohamed Elhoseiny, and Bernard Ghanem. Pointnext: Revisiting pointnet++ with improved training and scaling strategies. In *NeurIPS*, 2022. 1
- [7] Shi Qiu, Saeed Anwar, and Nick Barnes. Semantic segmentation for real point cloud scenes via bilateral augmentation and adaptive fusion. In *CVPR*, 2021. 1
- [8] Haoxi Ran, Jun Liu, and Chengjie Wang. Surface representation for point clouds. In *CVPR*, 2022. 1
- [9] Haoxi Ran, Wei Zhuo, Jun Liu, and Li Lu. Learning inner-group relations on point clouds. In *ICCV*, 2021. 1
- [10] Hugues Thomas, Charles R Qi, Jean-Emmanuel Deschaud, Beatriz Marcotequi, François Goulette, and Leonidas J Guibas. Kpconv: Flexible and deformable convolution for point clouds. In *ICCV*, 2019. 1
- [11] Yue Wang, Yongbin Sun, Ziwei Liu, Sanjay E Sarma, Michael M Bronstein, and Justin M Solomon. Dynamic graph cnn for learning on point clouds. *Acm Transactions On Graphics (tog)*, 2019. 1

- [12] Mutian Xu, Runyu Ding, Hengshuang Zhao, and Xiaojuan Qi. Paconv: Position adaptive convolution with dynamic kernel assembling on point clouds. In *CVPR*, 2021. 1
- [13] Xu Yan, Chaoda Zheng, Zhen Li, Sheng Wang, and Shuguang Cui. Pointasnl: Robust point clouds processing using nonlocal neural networks with adaptive sampling. In *CVPR*, 2020. 1
- [14] Ting Yao, Yehao Li, Yingwei Pan, and Tao Mei. Hgnet: Learning hierarchical geometry from points, edges, and surfaces. In *CVPR*, 2023. 1
- [15] Zhiyuan Zhang, Binh-Son Hua, and Sai-Kit Yeung. Shellnet: Efficient point cloud convolutional neural networks using concentric shells statistics. In *ICCV*, 2019. 1
- [16] Hengshuang Zhao, Li Jiang, Chi-Wing Fu, and Jiaya Jia. Pointweb: Enhancing local neighborhood features for point cloud processing. In *CVPR*, 2019. 1
- [17] Hengshuang Zhao, Li Jiang, Jiaya Jia, Philip HS Torr, and Vladlen Koltun. Point transformer. In *ICCV*, 2021. 1
